# Supplementary material for: Mo-doped TiO2photoanodes using [Ti4Mo2O8(OEt)10]2bimetallic oxo cages as a single source precursor
Source: Royal Society of Chemistry journal article supplement (doi:10.1039/c8se00372f), 2018-01-01
Supplement: c8se00372f1.pdf [file c8se00372f1.pdf]

## Electronic Supporting Information

### Mo-doped TiO<sub>2</sub> photoanodes using [Ti<sub>4</sub>Mo<sub>2</sub>O<sub>8</sub>(OEt)<sub>10</sub>]<sub>2</sub> bimetallic oxo cages as a single source precursor

Miriam Regue,<sup>a,b</sup> Katherine Armstrong,<sup>c</sup> Dominic Walsh,<sup>b</sup> Emma Richards,<sup>c</sup> Andrew Johnson,<sup>a,d</sup> and Salvador Eslava<sup>\*a,b</sup>

<sup>a</sup>Centre for Sustainable Chemical Technologies, University of Bath, Claverton Down, Bath, BA2 7AY, UK

<sup>b</sup>Department of Chemical Engineering, University of Bath, Claverton Down, Bath, BA2 7AY, UK

<sup>c</sup>EPR and ENDOR Spectroscopy, School of Chemistry, Cardiff University, Cardiff, CF10 3AT

<sup>d</sup>Department of Chemistry, University of Bath, Claverton Down, Bath, BA2 7AY, UK

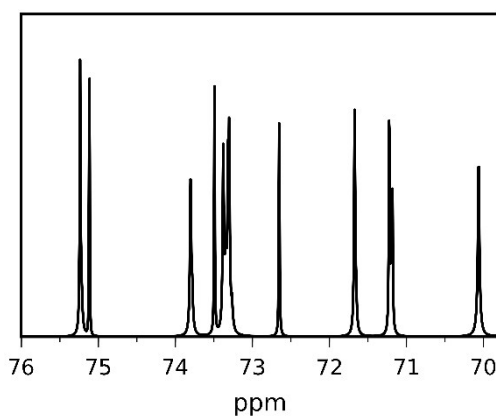

Fig. S1 <sup>13</sup>C NMR spectra of the -OCH<sub>2</sub>- resonance region of [Ti<sub>4</sub>Mo<sub>2</sub>O<sub>8</sub>(OEt)<sub>10</sub>]<sub>2</sub>, in agreement with literature [1]

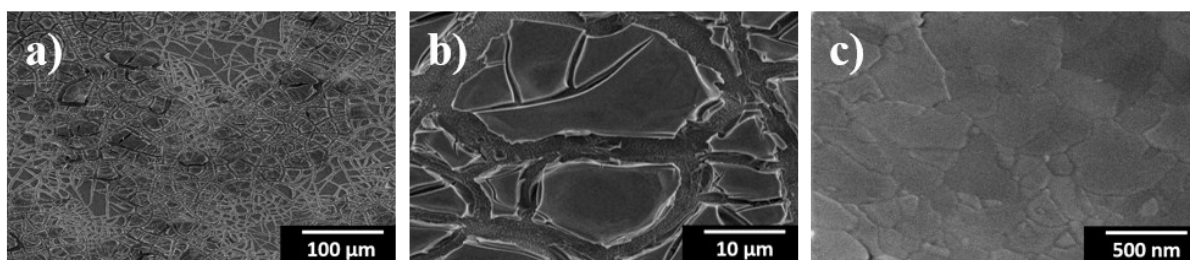

Fig. S2 SEM images of TiO<sub>2</sub>-650 photoanode.

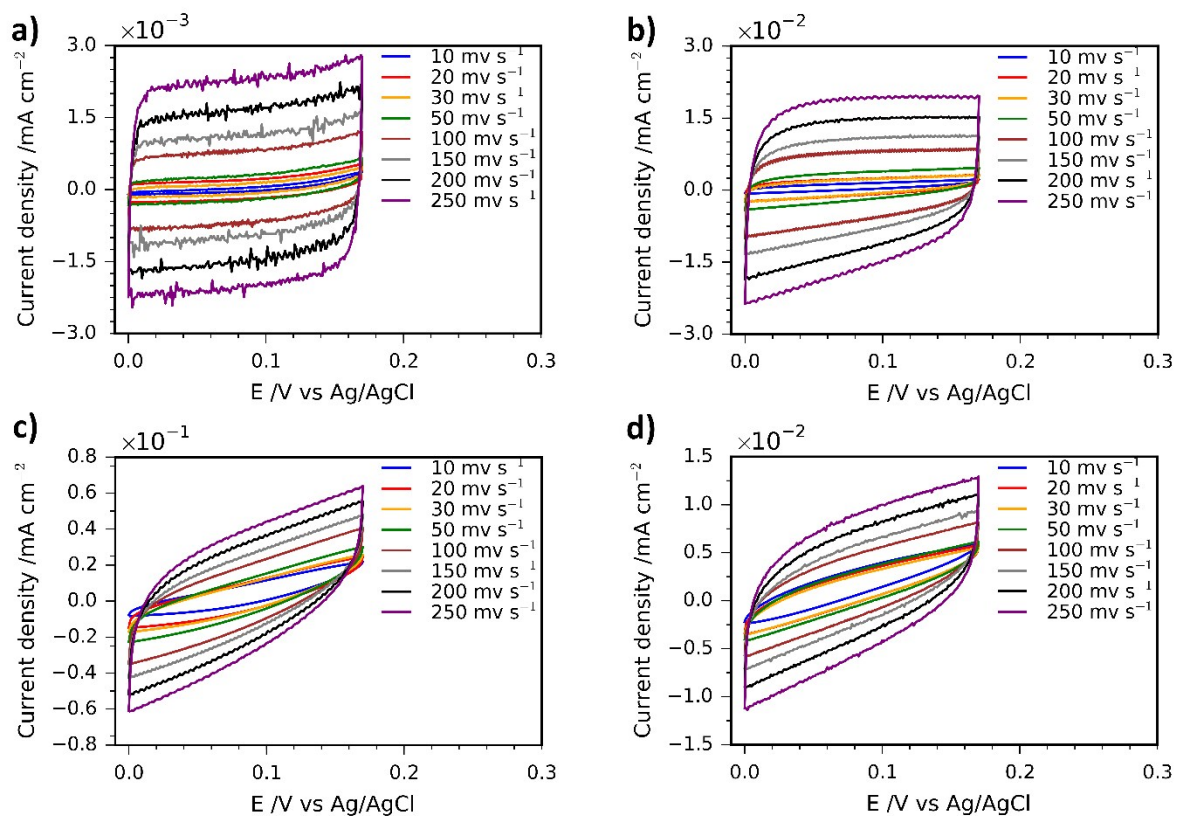

Fig. S3 Cyclic voltammetry curves for (a)  $\text{TiO}_2$ -650, (b)  $\text{Mo:TiO}_2$ -650, (c)  $\text{Mo:TiO}_2$ -700 and (d)  $\text{Mo:TiO}_2$ -800.

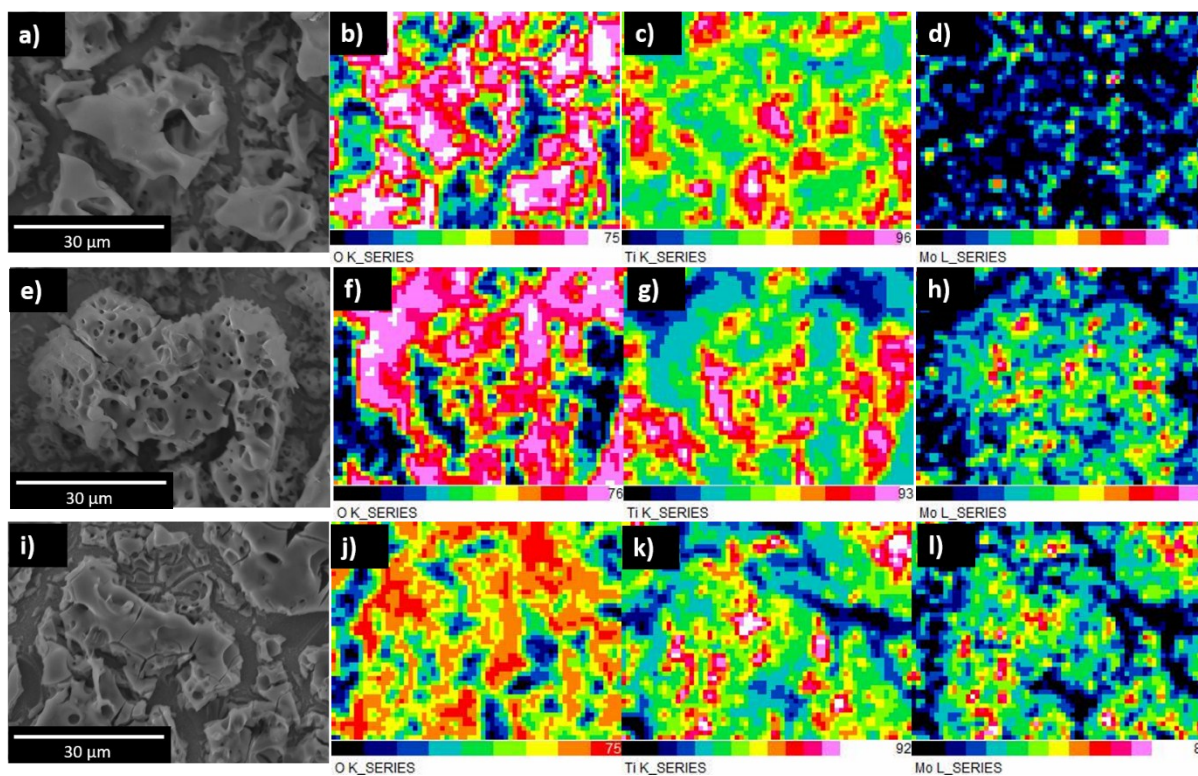

Fig. S4 SEM-EDXS images of  $\text{Mo:TiO}_2$  photoanodes. (a-d)  $\text{Mo:TiO}_2$ -800, (e-h)  $\text{Mo:TiO}_2$ -700 and (i-l)  $\text{Mo:TiO}_2$ -650.

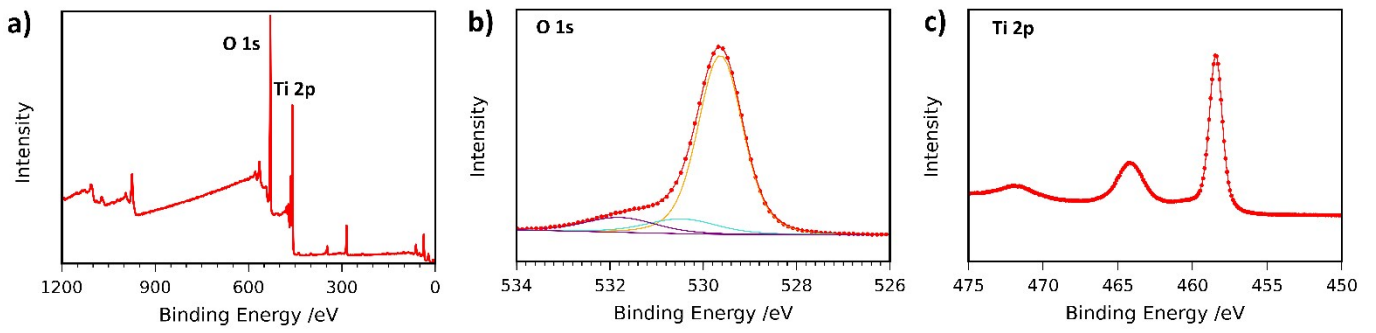

Fig. S5 XPS spectra of TiO<sub>2</sub>-650. (a) Survey, (b) O 1s and (c) Ti 2p.

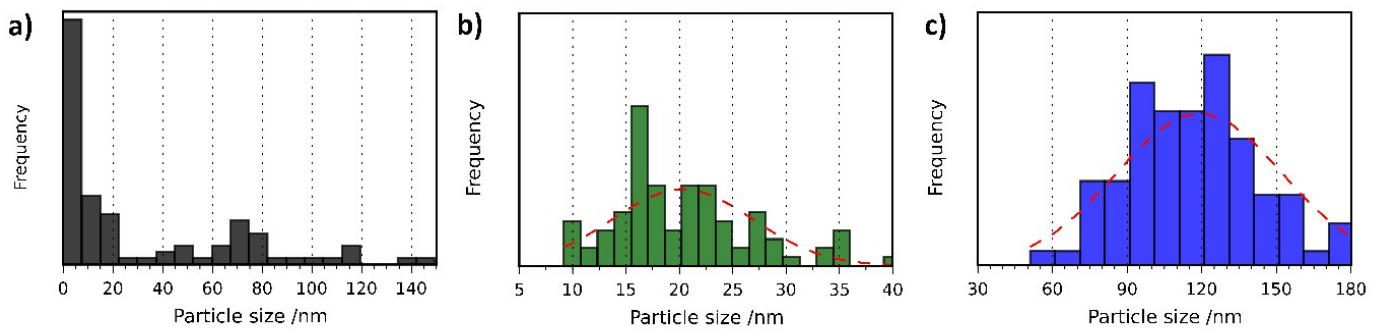

Fig. S6 Particle size distributions. (a) Mo:TiO<sub>2</sub>-650, (b) Mo:TiO<sub>2</sub>-700 and (c) Mo:TiO<sub>2</sub>-800.

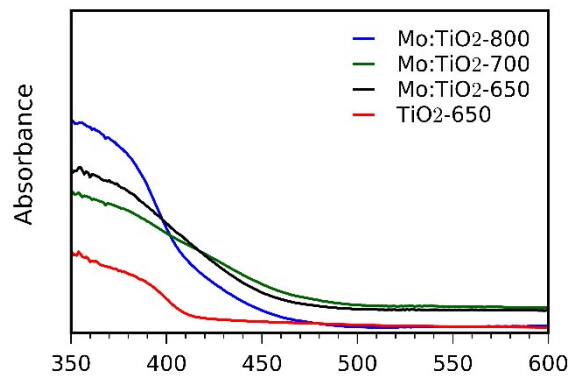

Fig. S7 Diffuse reflectance UV-Vis absorption spectra of Mo:TiO<sub>2</sub>-650, Mo:TiO<sub>2</sub>-700, Mo:TiO<sub>2</sub>-800 and pure TiO<sub>2</sub>-650 photoanodes.

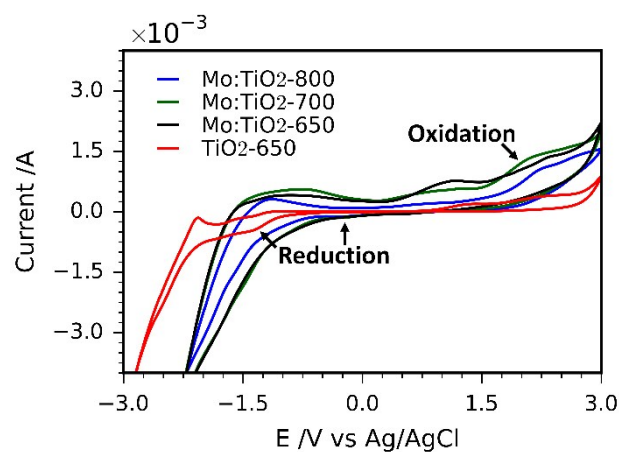

Fig. S8 Cyclic Voltammetry curves of TiO<sub>2</sub>-650 and Mo:TiO<sub>2</sub> photoanodes in acetonitrile containing 0.1M of TBAPF<sub>6</sub> at a scan rate of 50 mv s<sup>-1</sup>.

Table S1 Electrochemical characteristics of the bare TiO<sub>2</sub> and Mo:TiO<sub>2</sub> photoanodes.

| Sample                   | E <sup>ox</sup> <sub>peak</sub> (V)/ VB (eV) | E <sup>red</sup> <sub>peak</sub> (V)/ CB (eV) | E <sub>g</sub> (eV) |
|--------------------------|----------------------------------------------|-----------------------------------------------|---------------------|
| Mo:TiO <sub>2</sub> -650 | 2.32 / -6.69                                 | -0.19 / -4.18                                 | 2.51                |
| Mo:TiO <sub>2</sub> -700 | 2.08 / -6.45                                 | -0.22 / -4.15                                 | 2.30                |
| Mo:TiO <sub>2</sub> -800 | 2.23 / -6.60                                 | -0.23 / -4.14                                 | 2.46                |
| TiO <sub>2</sub> -650    | 2.22 / -6.59                                 | -1.36 / -3.01                                 | 3.58                |

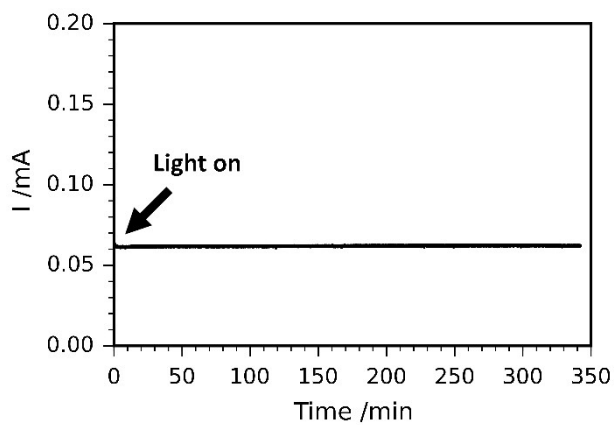

Fig. S9 Photocurrent-time curve of Mo:TiO<sub>2</sub>-700 obtained during the O<sub>2</sub> measurement experiment at 1.23V<sub>RHE</sub>.

## Faradaic efficiency calculation

To calculate the Faradaic efficiency, first the amount of O<sub>2</sub> evolved in the headspace of the PEC cell was calculated using the ideal gas law and the %O<sub>2</sub> measurements. Next, the theoretical amount of O<sub>2</sub> expected for a water oxidation reaction with 100% Faradaic efficiency was calculated. The following equation was used:

$$Q = n(e^-) * F$$

where  $Q$  is the charge in C, obtained from the photocurrent-time curve (Fig. S12);  $n(e^-)$  is the number of electrons in mol; and  $F$  is the Faraday constant (96485.3329 C mol<sup>-1</sup>). The theoretical amount of O<sub>2</sub> generated was calculated by dividing  $n(e^-)$  by four, which is the number of electrons involved in the oxidation of water. Finally, the Faradaic efficiency was calculated by dividing the amount of O<sub>2</sub> evolved in the headspace by the theoretical amount of O<sub>2</sub> expected for 100% Faradaic efficiency ( $\mu\text{mol}/\mu\text{mol} \times 100$ ).<sup>2</sup>

- 1 S. Eslava, B. P. R. Goodwill, M. McPartlin and D. S. Wright, *Inorg. Chem.*, 2011, **50**, 5655–5662.
- 2 J. A. Seabold and K.-S. Choi, *Chem. Mater.*, 2011, **23**, 1105–1112.
